# Supplementary material for: Three-Dimensional Analysis of the Characteristics of the Femoral Canal Isthmus: An Anatomical Study
Source: Biomed Res Int. 2015 Jun 7;2015:459612. doi: 10.1155/2015/459612 (PMC4475546; doi:10.1155/2015/459612)
Supplement: Supplementary file 1 — Description of video 1: This was a y-axial view. After the virtual force along the z axis directing to the X-Y plane was applied to the femur model, the femur was placed on the coronal (X-Y) plane. This application could ensure that the posterior aspects of the medial and lateral femoral condyles and the greater trochanter contacted the X-Y plane. Description of video 2: This was a z-axial view. After the previous step in video 1, the virtual force along the Y axis directing to the X-Z plane was applied to the femur model. This application could ensure that the distal aspects of the medial and lateral femoral condyles contacted the X-Z plane. [file 459612.f1.zip]

Archive with 2 entries (2 files):
- Video 1.avi
- Video 2.avi
